# Supplementary material for: High expression of miR-17-5p and miR-20a-5p predicts favorable disease-specific survival in stage I-III colon cancer
Source: PubMed Central journal article supplement (PMC9056518; doi:10.1038/s41598-022-11090-2), 2022-04-30
Supplement: 41598_2022_11090_MOESM1_ESM.pdf [file 41598_2022_11090_MOESM1_ESM.pdf]

```
//Script for miR-17-5p
```

```
import qupath.lib.objects.PathAnnotationObject
import qupath.lib.objects.TMACoreObject
import qupath.lib.objects.hierarchy.PathObjectHierarchy

setImageType('BRIGHTFIELD_OTHER');
setColorDeconvolutionStains({'Name' : "miR17_Red", "Stain 1" : "miR17", "Values 1" : "0.71029
0.65126 0.26711 ", "Stain 2" : "Red", "Values 2" : "0.14996 0.89274 0.42488 ", "Background" : "
255 255 255 "});
selectTMACores();
runPlugin('qupath.imagej.detect.tissue.SimpleTissueDetection2', {'threshold': 249,
"requestedPixelSizeMicrons": 2.0, "minAreaMicrons": 10000.0, "maxHoleAreaMicrons": 1000.0,
"darkBackground": false, "smoothImage": true, "medianCleanup": true, "dilateBoundaries": false,
"smoothCoordinates": true, "excludeOnBoundary": false, "singleAnnotation": true});
selectAnnotations();
runPlugin('qupath.lib.algorithms.TilerPlugin', {'tileSizeMicrons': 10.0, "trimToROI": true,
"makeAnnotations": false, "removeParentAnnotation": false});
selectDetections();
runPlugin('qupath.lib.algorithms.IntensityFeaturesPlugin', {'pixelSizeMicrons': 2.0, "region":
"ROI", "tileSizeMicrons": 25.0, "colorOD": true, "colorStain1": true, "colorStain2": true,
"colorStain3": false, "colorRed": true, "colorGreen": true, "colorBlue": true, "colorHue": true,
"colorSaturation": true, "colorBrightness": true, "doMean": true, "doStdDev": true, "doMinMax":
true, "doMedian": true, "doHaralick": true, "haralickDistance": 1, "haralickBins": 32});
selectTMACores();
runPlugin('qupath.lib.plugins.objects.SmoothFeaturesPlugin', {'fwhmMicrons': 25.0,
"smoothWithinClasses": false, "useLegacyNames": false});
runPlugin('qupath.lib.plugins.objects.SmoothFeaturesPlugin', {'fwhmMicrons': 75.0,
"smoothWithinClasses": false, "useLegacyNames": false});
removeObjects(getAnnotationObjects(), true)

runClassifier('path_to_your_classifier')
selectTMACores();
runPlugin('qupath.lib.analysis.objects.TileClassificationsToAnnotationsPlugin', {'pathClass': "All
classes", "deleteTiles": true, "clearAnnotations": false, "splitAnnotations": false});
selectAnnotations();
runPlugin('qupath.lib.algorithms.IntensityFeaturesPlugin', {'pixelSizeMicrons': 2.0, "region":
"ROI", "tileSizeMicrons": 25.0, "colorOD": false, "colorStain1": true, "colorStain2": false,
"colorStain3": false, "colorRed": false, "colorGreen": false, "colorBlue": false, "colorHue": false,
"colorSaturation": false, "colorBrightness": false, "doMean": true, "doStdDev": true,
"doMinMax": true, "doMedian": true, "doHaralick": false, "haralickDistance": 1, "haralickBins":
32});

def addMeasurements(PathObjectHierarchy hierarchy, TMACoreObject core, pixelWidth,
pixelHeight) {
    def annotations = hierarchy.getDescendantObjects(core, null, PathAnnotationObject)

    //Check if core has annotation
    if (annotations.size() > 0) {

        //check if each annotation is of interest, and if so, keep track of the positive and negative cells
        within
```

```

    annotations.each { annotation ->
        annotationName = annotation.getPathClass().getName()
        if (annotation.getROI().getScaledArea(pixelWidth, pixelHeight) >
MIN_AREA_MICRONS) {
            def measures = annotation.getMeasurementList()
            measures.each {
                def measureName = it.getName().tokenize()[5,6].join()
                def measure = it.getValue()
                core.getMeasurementList().putMeasurement("${annotationName} ${measureName}",
measure)
            }
        }
    }
    }else{
        core.setMissing(true)
    }
}
MIN_AREA_MICRONS = 40000
def server = getCurrentImageData().getServer()
double pixelWidth = server.getPixelWidthMicrons()
double pixelHeight = server.getPixelHeightMicrons()
def hierarchy = getCurrentHierarchy()
def cores = hierarchy.getTMAGrid().getTMACoreList()
cores.each {
    addMeasurements(hierarchy, it, pixelWidth, pixelHeight)
}
fireHierarchyUpdate()
println("Finished")

```

```
//Script for miR-20a-5p
```

```
import qupath.lib.objects.PathAnnotationObject
import qupath.lib.objects.TMACoreObject
import qupath.lib.objects.hierarchy.PathObjectHierarchy
```

```
setImageType('BRIGHTFIELD_OTHER');
setColorDeconvolutionStains({'Name' : "miR20a_colon", "Stain 1" : "miR20a-5p", "Values 1" :
"0.66521 0.71006 0.2309 ", "Stain 2" : "Red", "Values 2" : "0.22275 0.86345 0.45259 ",
"Background" : " 255 255 255 "});
selectTMACores();
runPlugin('qupath.imagej.detect.tissue.SimpleTissueDetection2', '{"threshold": 250,
"requestedPixelSizeMicrons": 2.0, "minAreaMicrons": 1000.0, "maxHoleAreaMicrons":
100000.0, "darkBackground": false, "smoothImage": true, "medianCleanup": true,
"dilateBoundaries": false, "smoothCoordinates": true, "excludeOnBoundary": false,
"singleAnnotation": true}');
selectAnnotations();
runPlugin('qupath.lib.algorithms.TilerPlugin', '{"tileSizeMicrons": 10.0, "trimToROI": true,
"makeAnnotations": false, "removeParentAnnotation": false}');
selectDetections();
runPlugin('qupath.lib.algorithms.IntensityFeaturesPlugin', '{"pixelSizeMicrons": 2.0, "region":
"ROI", "tileSizeMicrons": 10.0, "colorOD": true, "colorStain1": true, "colorStain2": true,
"colorStain3": false, "colorRed": true, "colorGreen": false, "colorBlue": true, "colorHue": true,
"colorSaturation": true, "colorBrightness": true, "doMean": false, "doStdDev": true,
"doMinMax": false, "doMedian": true, "doHaralick": true, "haralickDistance": 1, "haralickBins":
32}');
selectAnnotations();
runPlugin('qupath.lib.plugins.objects.SmoothFeaturesPlugin', '{"fwhmMicrons": 25.0,
"smoothWithinClasses": false, "useLegacyNames": false}');
runPlugin('qupath.lib.plugins.objects.SmoothFeaturesPlugin', '{"fwhmMicrons": 75.0,
"smoothWithinClasses": false, "useLegacyNames": false}');
removeObjects(getAnnotationObjects(), true)
```

```
runClassifier('path_to_your_classifier');
selectTMACores();
runPlugin('qupath.lib.analysis.objects.TileClassificationsToAnnotationsPlugin', '{"pathClass": "All
classes", "deleteTiles": true, "clearAnnotations": false, "splitAnnotations": false}');
selectAnnotations();
runPlugin('qupath.lib.algorithms.IntensityFeaturesPlugin', '{"pixelSizeMicrons": 2.0, "region":
"ROI", "tileSizeMicrons": 25.0, "colorOD": false, "colorStain1": true, "colorStain2": false,
"colorStain3": false, "colorRed": false, "colorGreen": false, "colorBlue": false, "colorHue": false,
"colorSaturation": false, "colorBrightness": false, "doMean": true, "doStdDev": true,
"doMinMax": true, "doMedian": true, "doHaralick": false, "haralickDistance": 1, "haralickBins":
32}');
```

```
def addMeasurements(PathObjectHierarchy hierarchy, TMACoreObject core, pixelWidth,
pixelHeight) {
```

```
    def annotations = hierarchy.getDescendantObjects(core, null, PathAnnotationObject)
```

```
    //Check if core has annotation
```

```
    if (annotations.size() > 0) {
```

```

//check if each annotation is of interest, and if so, keep track of the positive and negative cells
within
  annotations.each { annotation ->
    annotationName = annotation.getPathClass().getName()
    if (annotation.getROI().getScaledArea(pixelWidth, pixelHeight) >
MIN_AREA_MICRONS) {
      def measures = annotation.getMeasurementList()
      measures.each {
        def measureName = it.getName().tokenize()[5,6].join()
        def measure = it.getValue()
        core.getMeasurementList().putMeasurement("${annotationName} ${measureName}",
measure)
      }
    }
  }else{
    core.setMissing(true)
  }
}
MIN_AREA_MICRONS = 40000
def server = getCurrentImageData().getServer()
double pixelWidth = server.getPixelWidthMicrons()
double pixelHeight = server.getPixelHeightMicrons()
def hierarchy = getCurrentHierarchy()
def cores = hierarchy.getTMAGrid().getTMACoreList()
cores.each {
  addMeasurements(hierarchy, it, pixelWidth, pixelHeight)
}
fireHierarchyUpdate()
println("Finished")

```
